# Supplementary material
Source: PubMed Central journal article supplement (PMC5578916)

# LODO

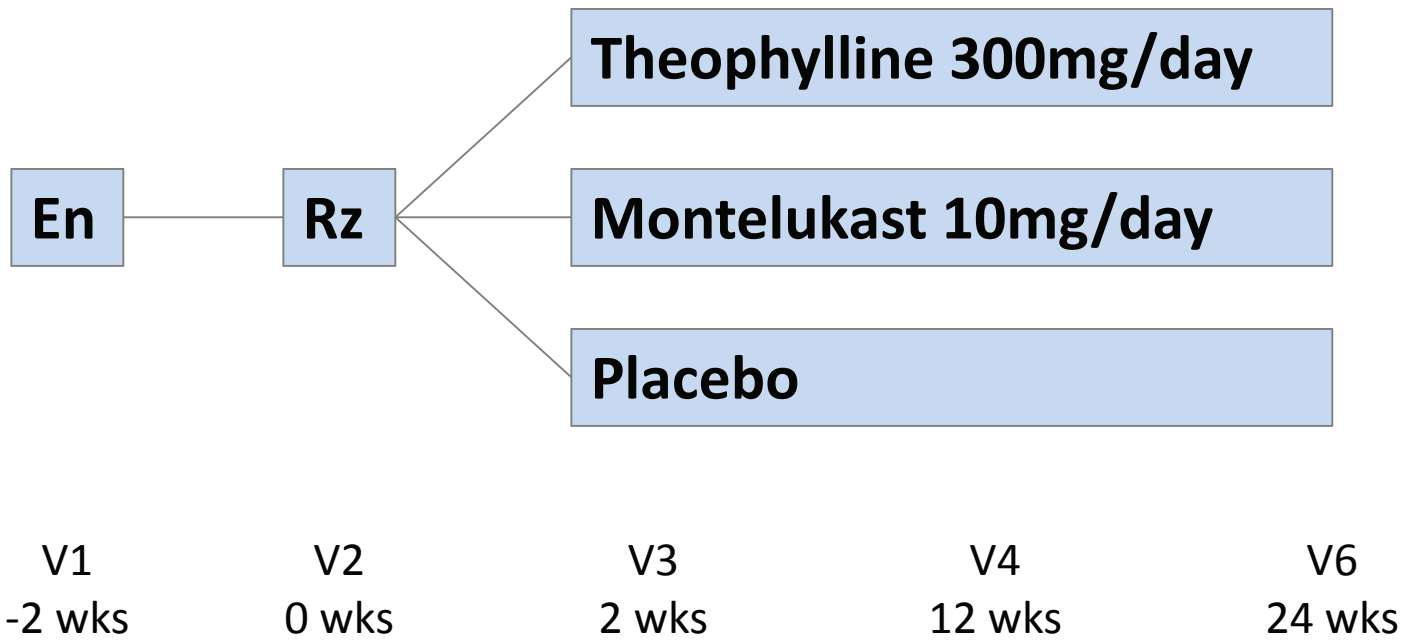

Supplement: NIHMS873613-supplement-Supp_Fig_S1.pdf [file NIHMS873613-supplement-Supp_Fig_S1.pdf]

24 hr

7 day

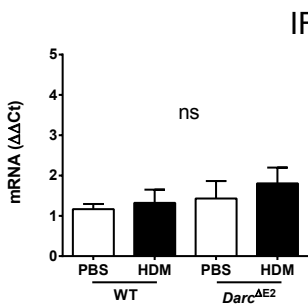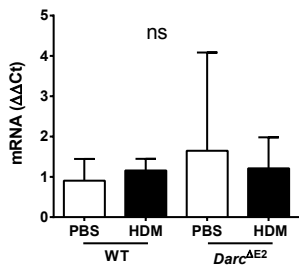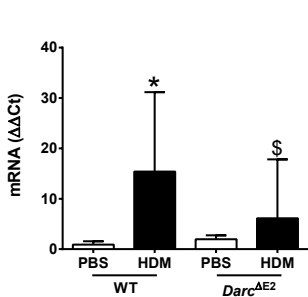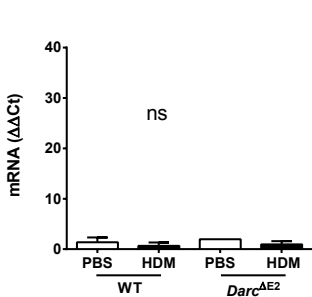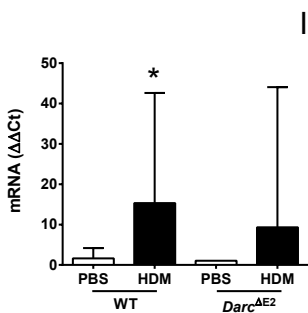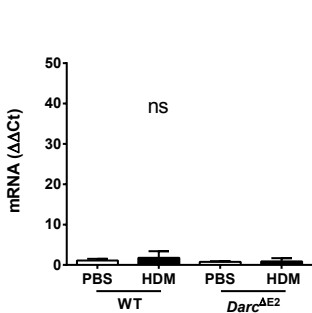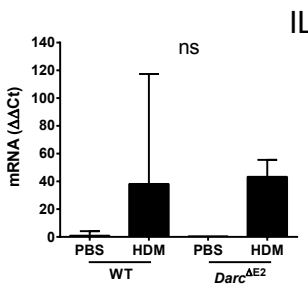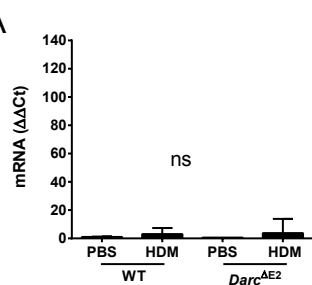

Supplement: NIHMS873613-supplement-Supp_Fig_S2.pdf [file NIHMS873613-supplement-Supp_Fig_S2.pdf]
